# Supplementary material
Source: PubMed Central journal article supplement (PMC7324510)
Supplement: supp_RA119.010839_155497_2_supp_519393_q9jfbr.pdf [file supp_RA119.010839_155497_2_supp_519393_q9jfbr.pdf]

# **The intragenic microRNA *miR199A1* in the *dynamitin 2* gene contributes to the pathology of X-linked centronuclear myopathy**

Xin Chen<sup>1,a</sup>, Yun-Qian Gao<sup>2,3,a</sup>, Yan-Yan Zheng<sup>1,a</sup>, Wei Wang<sup>1</sup>, Pei Wang<sup>1</sup>, Juan Liang<sup>1</sup>, Wei Zhao<sup>1</sup>, Tao Tao<sup>1</sup>, Jie Sun<sup>1</sup>, Lisha Wei<sup>1</sup>, Yeqiong Li<sup>1</sup>, Yuwei Zhou<sup>1</sup>, Zhenji Gan<sup>1</sup>, Xuena Zhang<sup>1,b</sup>, Hua-Qun Chen<sup>4,b</sup>, Min-Sheng Zhu<sup>1,b</sup>

<sup>1</sup>State Key Laboratory of Pharmaceutical Biotechnology, Model Animal Research Center, Ministry of Education (MOE) Key Laboratory of Model Animal for Disease Study and the Medical School, Nanjing University, Nanjing 210061, China. <sup>2</sup>Obstetrics and Gynecology Hospital, State Key Laboratory of Genetic Engineering and Collaborative Innovation Center for Genetics & Development at School of Life Sciences of Fudan University, 20043 Shanghai, China. <sup>3</sup>Institute of Biomedical Sciences, Shanghai Medical College, Fudan University, Shanghai 200032, China <sup>4</sup>College of Life Science, Nanjing Normal University, Nanjing 210046, China.

Running title: **MiR-199a-1 regulates X-linked centronuclear myopathy**

<sup>a</sup>These authors contribute this work equally

<sup>b</sup>To whom correspondence should be addressed. Zhu Min-Sheng, The Model Animal Research Center, Nanjing University, Nanjing 210061, China. E-mail: [zhums@nju.edu.cn](mailto:zhums@nju.edu.cn); Phone: +86-25-58641529. Or Chen Hua-Qun, The College of Life Science, Nanjing Normal University, Nanjing 210023, China. E-mail: [chenhuaqun@njjnu.edu.cn](mailto:chenhuaqun@njjnu.edu.cn); Phone: +86-25- 85891353. Or Zhang Xue-Na, The Model Animal Research Center, Nanjing University, Nanjing 210061, China. E-mail: [zhangxn@nicemice.cn](mailto:zhangxn@nicemice.cn); Phone: +86-25-58641526

**This PDF file includes:**

Fig. S1 to S3

Table. S1

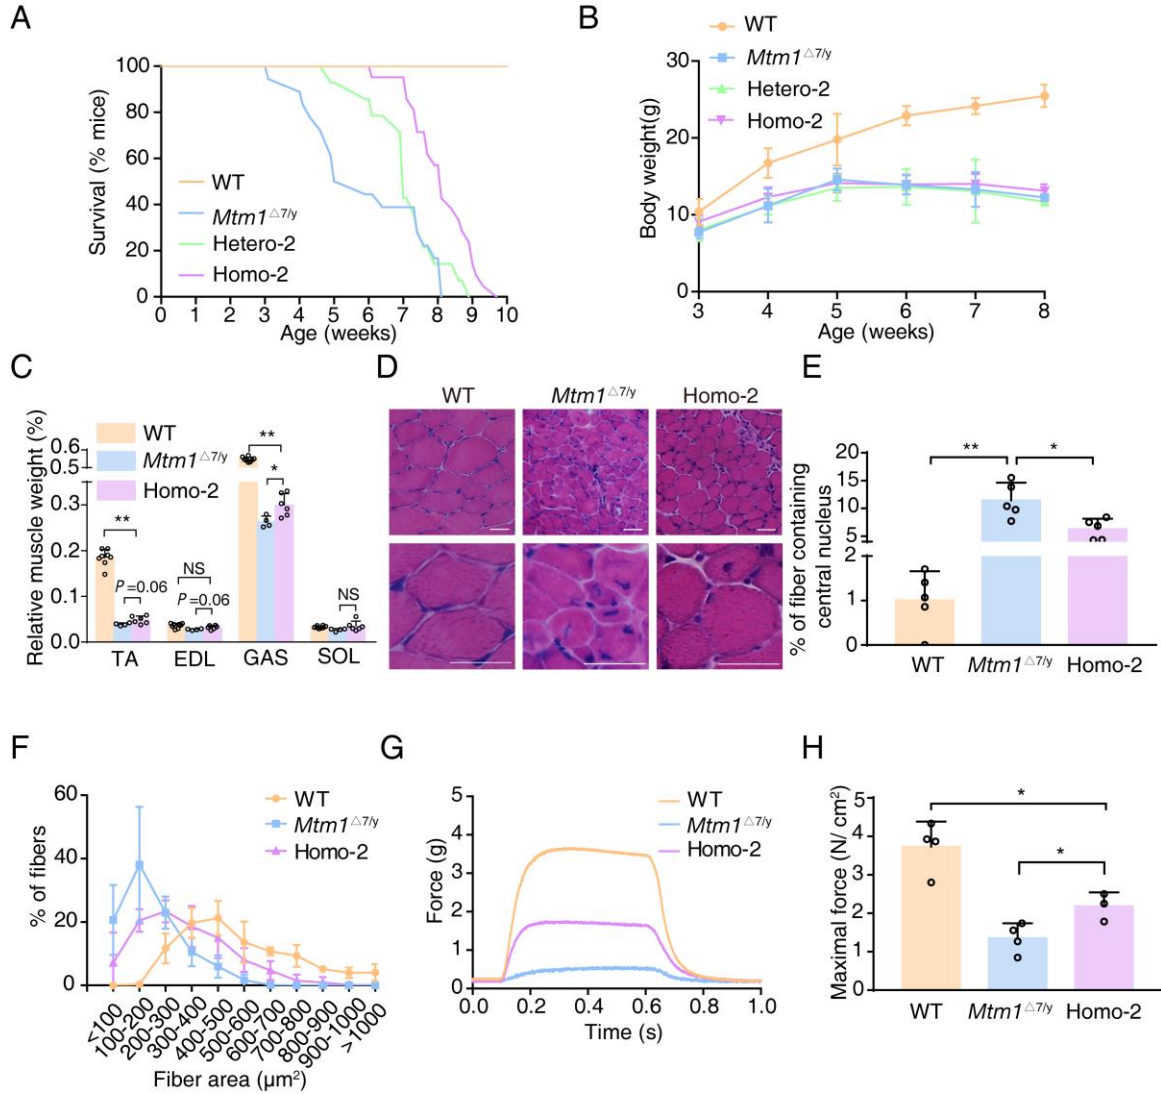

**Figure S1. Deletion of miR-199a-1 partially improved symptoms in *Mtm1*<sup>Δ7/y</sup> mice.** (A) Lifespan of indicated mice ( $n = 14-30$ ). (B) The whole-body weight of indicated mice were recorded from 3 to 8-week-old ( $n = 12-25$ ). (C) Relative muscle weight of labeled muscle from different mice ( $n = 4-8$ ). TA, tibialis anterior; GAS, gastrocnemius; EDL, extensor digitorum longus; SOL, soleus. (D) Characteristic muscle biopsy from different mice. Scale bar = 20 nm. (E) The ratio of centronuclear myofiber number to total fiber number ( $n = 5$ ). (F) Distribution of myofibers was grouped according to cross-sectional area ( $n = 5$ ). (G) The typical EDL contraction curve induced by electric stimulus. (H) Quantification of maximal forces in G ( $n = 3-4$ ). The data of WT mice were also present in Fig. 2 and 3. All muscles from 6-week-old mice. Graphs represent mean  $\pm$  SD. NS, no significant difference; \* $P < 0.05$ ; \*\* $P < 0.01$  (2-tailed Student's  $t$  test).

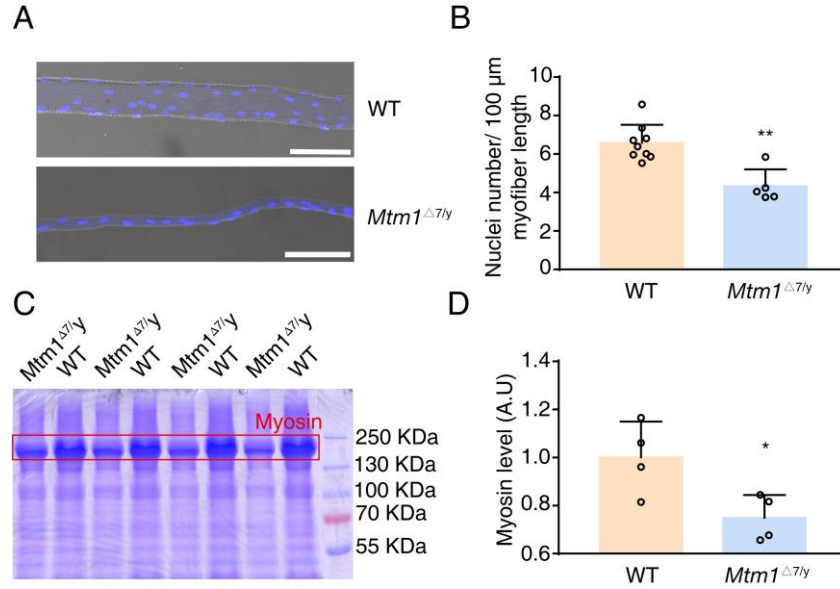

**Figure S2. *Mtm1*<sup>Δ7/y</sup> mice exhibit defect in myoblast fusion.** (A) Immunofluorescence with DAPI staining for single myofiber from 3-weeks-old WT and *Mtm1*<sup>Δ7/y</sup> mice. Scale bar = 100 μm. The data of WT mice were also present in Fig. 4A. (B) Quantification of nuclei number per 100 μm myofiber (*n* = 5-9). The data of WT mice were also present in Fig. 4B. (C) Protein lysates from the TA muscle of 3-week-old mice were separated by SDS-PAGE gel and stained by Coomassie brilliant blue. The red box represents the myosin heavy chain band at approximately 230 kDa. (D) The expression of myosin was measured by gray level (*n* = 4). A.U, arbitrary units. Graphs represent mean ± SD. \**P* < 0.05; \*\**P* < 0.01 (2-tailed Student's *t* test).

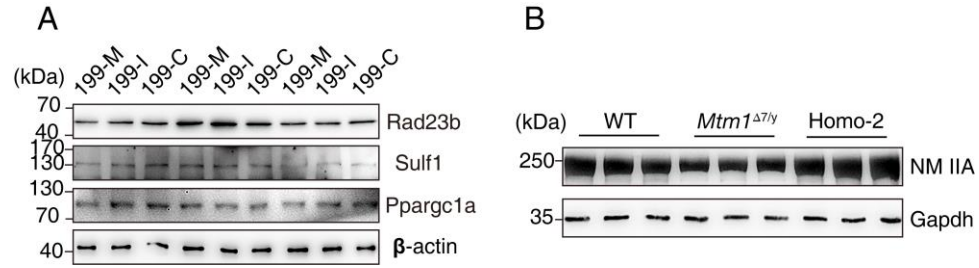

**Figure S3. MiR-199a-1 inhibits NM IIA expression.** (A) C2C12 cells treated with miR-199a-5p oligonucleotides were subjected to Western blot of predicted miR-199a-1 target proteins. 199-M, miR-199a-5p mimic; 199-I, miR-199a-5p inhibitor; 199-C, control oligonucleotides. (B) Western blot with NM IIA antibody for lysates of 3-week-old TA muscle. Gapdh was as an internal control.

**Table S1. Primer sequence in PCR.**

| Primer name                     | Sequence (5'-3')                                                |
|---------------------------------|-----------------------------------------------------------------|
| miR-199a-1 vector forward       | AGATCTCCTAGTCTGCTGCAAATGTGC                                     |
| miR-199a-1 vector reverse       | GTCGACTCACAGACCAGGTACGCAAT                                      |
| <i>Myh9</i> -3'-UTR-WT forward  | ACTAGTCCTGCCTTGAGACTGCTCTGACCA                                  |
| <i>Myh9</i> -3'-UTR-WT reverse  | ACTAGTTGTGACGCTCAGTGGAAACAT                                     |
| <i>Myh9</i> -3'-UTR-mut forward | CCATGGGTCGCTGAGTTCCT                                            |
| <i>Myh9</i> -3'-UTR-mut reverse | AGACATTGTAGGGCAAGCTACTCTCTTC                                    |
| <i>Dnm2</i> -B1-Mut forward     | ACTTCCACCCTAAGGAATTCCATGTCCTCTTCTCA                             |
| <i>Dnm2</i> -B1-Mut reverse     | GGAATTCCCTTAGGGTGGAAGTTAAGAGCAGTTGTCA                           |
| <i>Dnm2</i> -B2-Mut forward     | GGTGTGACAGACCTCTGGAAGTGAATCACTGATGGT                            |
| <i>Dnm2</i> -B2-Mut reverse     | CAGTTCCAGAGGTCTGACACCCTCGTCTGGCCT                               |
| <i>Dnm2</i> -WT forward         | CTCGAGCAAAAACTAAGAGAAGTGACAAGGC                                 |
| <i>Dnm2</i> -WT reverse         | AAGCTTATCCGGTTCTCAGGCGACAC                                      |
| miRNA-RT primer                 | GCTGTCAACGATACGCTACGTAACGGCATGACAGTGT<br>TTTTTTTTTTTTTTTTTTTTTA |
| miR-199a-5p qPCR forward        | CCCAGTGTTTCAGACTACCTGTTC                                        |
| miR-199a-5p qPCR reverse        | GCTGTCAACGATACGCTACGTAACG                                       |
| 5S rRNA qPCR forward            | GTCTACGGCCATACCACCCTGAAC                                        |
| 5S rRNA qPCR reverse            | GCTGTCAACGATACGCTACGTAACG                                       |
| <i>Actb</i> qPCR forward        | AGGCCAACCGTGAAAAGATG                                            |
| <i>Actb</i> qPCR reverse        | AGAGCATAGCCCTCGTAGATGG                                          |
| <i>Gapdh</i> qPCR forward       | TGAACGGGAAGCTCACTGG                                             |
| <i>Gapdh</i> qPCR reverse       | TCCACCACCCTGTTGCTGTA                                            |
| <i>Dnm2</i> qPCR forward        | AAGAGCCGAGTTTGAAGTGTG                                           |
| <i>Dnm2</i> qPCR reverse        | ACGACTGCTCAATGTCAATCAG                                          |
| miR-199a-1 qPCR forward         | GCCATCCCAGTGTTTCAGACTA                                          |
| miR-199a-1 qPCR reverse         | GCCTAACCAATGTGCAGACT                                            |
